# Supplementary material for: Conversion Strategy in Left-Sided RAS/BRAF Wild-Type Metastatic Colorectal Cancer Patients with Unresectable Liver-Limited Disease: A Multicenter Cohort Study
Source: MDPI journal article supplement (doi:10.3390/cancers14225513), 2022-11-09
Supplement: s1 [file s1]

# **Conversion strategy in left-sided RAS/BRAF wild type metastatic colorectal cancer patients with liver-limited disease: a multicenter cohort study**

## **Supplementary materials**

### **INDEX**

|                                                                                              |    |
|----------------------------------------------------------------------------------------------|----|
| 1) Figure S1: Kaplan-Meier curves for OS including R2 resections with curative intent        | 2  |
| 2) Figure S2: Kaplan-Meier curves for PFS including R2 resections with curative intent       | 3  |
| 3) Figure S3: Kaplan-Meier curves for OS including all R2 resections                         | 4  |
| 4) Figure S4: Kaplan-Meier curves for PFS including all R2 resections                        | 5  |
| 5) Figure S5: Kaplan-Meier curves for PFS of patients discussed within and outside MDT       | 6  |
| 6) Figure S6: Kaplan-Meier curves for OS of patients receiving different I line ST regimens  | 8  |
| 7) Figure S7: Kaplan-Meier curves for PFS of patients receiving different I line ST regimens | 10 |

# 1) Figure S1: Kaplan-Meier curves for OS including R2 resections with curative intent

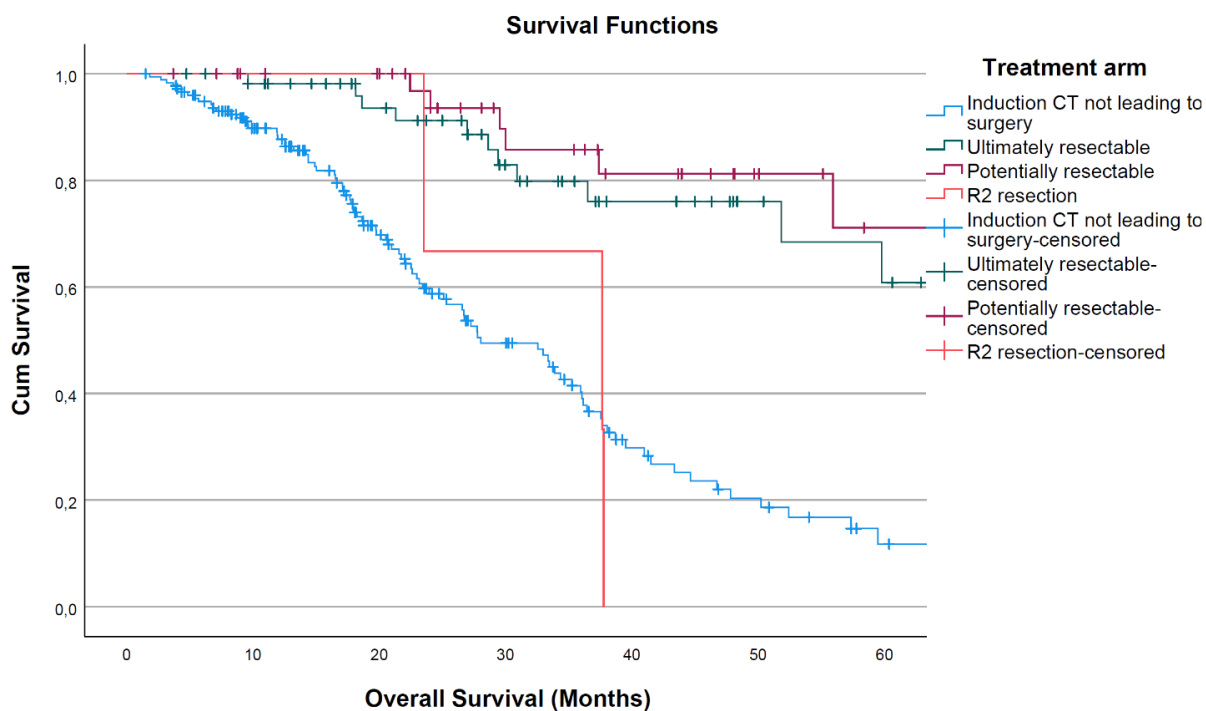

**Means and Medians for Survival Time**

| Treatment arm                       | Estimate | Std. Error | Mean <sup>a</sup>       |             | Estimate | Std. Error | Median                  |             |
|-------------------------------------|----------|------------|-------------------------|-------------|----------|------------|-------------------------|-------------|
|                                     |          |            | 95% Confidence Interval |             |          |            | 95% Confidence Interval |             |
|                                     |          |            | Lower Bound             | Upper Bound |          |            | Lower Bound             | Upper Bound |
| Induction CT not leading to surgery | 33,078   | 1,918      | 29,318                  | 36,838      | 28,039   | 3,007      | 22,145                  | 33,933      |
| Ultimately resectable               | 62,974   | 4,336      | 54,476                  | 71,472      | 79,379   | .000       | .                       | .           |
| Potentially resectable              | 83,119   | 8,212      | 67,024                  | 99,213      | .        | .          | .                       | .           |
| R2 resection                        | 32,985   | 4,728      | 23,718                  | 42,251      | 37,647   | 11,527     | 15,054                  | 60,240      |
| Overall                             | 47,831   | 3,515      | 40,942                  | 54,720      | 37,778   | 2,638      | 32,606                  | 42,949      |

a. Estimation is limited to the largest survival time if it is censored.

**Pairwise Comparisons**

|                       | Treatment arm                       | Induction CT not leading to surgery |       | Ultimately resectable |       | Potentially resectable |       | Ultimately resectable - R2 resection |      |
|-----------------------|-------------------------------------|-------------------------------------|-------|-----------------------|-------|------------------------|-------|--------------------------------------|------|
|                       |                                     | Chi-Square                          | Sig.  | Chi-Square            | Sig.  | Chi-Square             | Sig.  | Chi-Square                           | Sig. |
| Log Rank (Mantel-Cox) | Induction CT not leading to surgery |                                     |       | 29,582                | <,001 | 29,187                 | <,001 | ,043                                 | ,836 |
|                       | Ultimately resectable               | 29,582                              | <,001 |                       |       | ,588                   | ,443  | 6,314                                | ,012 |
|                       | Potentially resectable              | 29,187                              | <,001 | ,588                  | ,443  |                        |       | 9,352                                | ,002 |
|                       | R2 resection                        | ,043                                | ,836  | 6,314                 | ,012  | 9,352                  | ,002  |                                      |      |

## 2) Figure S2: Kaplan-Meier curves for PFS including R2 resections with curative intent

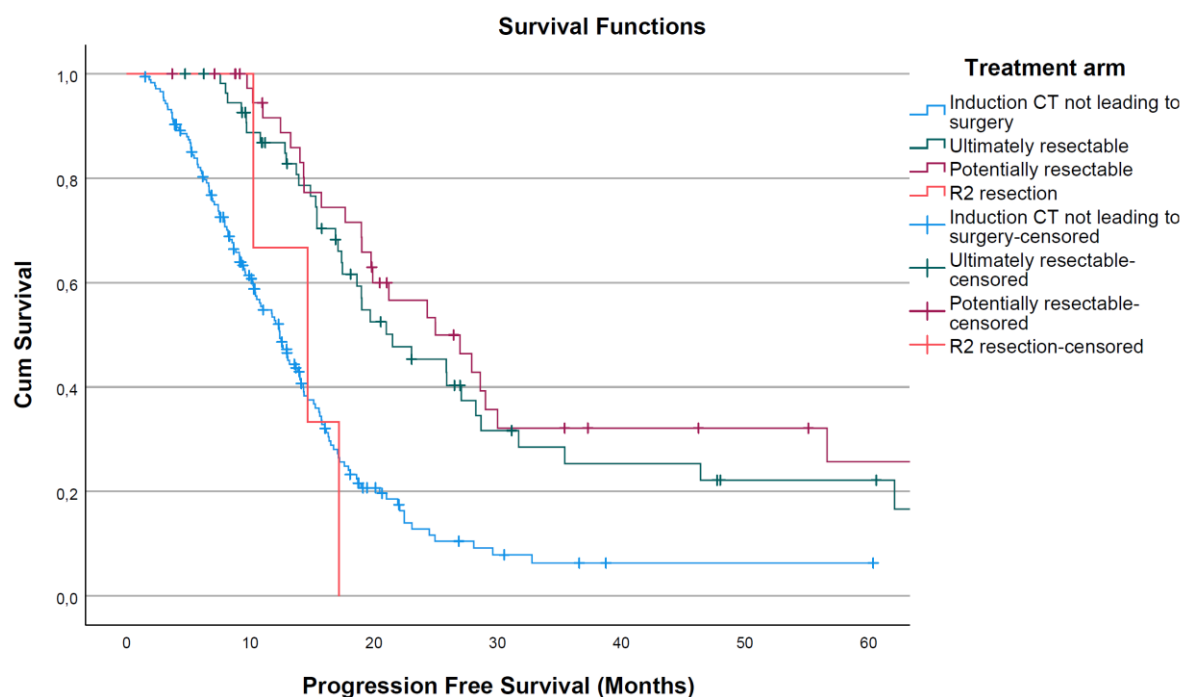

**Means and Medians for Survival Time**

| Treatment arm                       | Estimate | Std. Error | Mean <sup>a</sup>       |             | Estimate | Std. Error | Median                  |             |
|-------------------------------------|----------|------------|-------------------------|-------------|----------|------------|-------------------------|-------------|
|                                     |          |            | 95% Confidence Interval |             |          |            | 95% Confidence Interval |             |
|                                     |          |            | Lower Bound             | Upper Bound |          |            | Lower Bound             | Upper Bound |
| Induction CT not leading to surgery | 15,483   | 1,250      | 13,034                  | 17,932      | 12,386   | ,832       | 10,754                  | 14,017      |
| Ultimately resectable               | 31,831   | 3,705      | 24,570                  | 39,093      | 21,503   | 3,548      | 14,549                  | 28,458      |
| Potentially resectable              | 42,152   | 6,813      | 28,798                  | 55,507      | 24,967   | 4,221      | 16,695                  | 33,240      |
| R2 resection                        | 14,031   | 2,023      | 10,065                  | 17,996      | 14,641   | 3,576      | 7,633                   | 21,649      |
| Overall                             | 25,725   | 2,288      | 21,240                  | 30,210      | 15,392   | ,732       | 13,958                  | 16,826      |

a. Estimation is limited to the largest survival time if it is censored.

**Pairwise Comparisons**

|                       | Treatment arm                       | Induction CT not leading to surgery |       | Ultimately resectable |       | Potentially resectable |       | Ultimately resectable - R2 resection |      |
|-----------------------|-------------------------------------|-------------------------------------|-------|-----------------------|-------|------------------------|-------|--------------------------------------|------|
|                       |                                     | Chi-Square                          | Sig.  | Chi-Square            | Sig.  | Chi-Square             | Sig.  | Chi-Square                           | Sig. |
| Log Rank (Mantel-Cox) | Induction CT not leading to surgery |                                     |       | 25,718                | <,001 | 25,944                 | <,001 | ,009                                 | ,923 |
|                       | Ultimately resectable               | 25,718                              | <,001 |                       |       | ,645                   | ,422  | 5,445                                | ,020 |
|                       | Potentially resectable              | 25,944                              | <,001 | ,645                  | ,422  |                        |       | 7,240                                | ,007 |
|                       | R2 resection                        | ,009                                | ,923  | 5,445                 | ,020  | 7,240                  | ,007  |                                      |      |

### 3) Figure S3: Kaplan-Meier curves for OS including all R2 resections

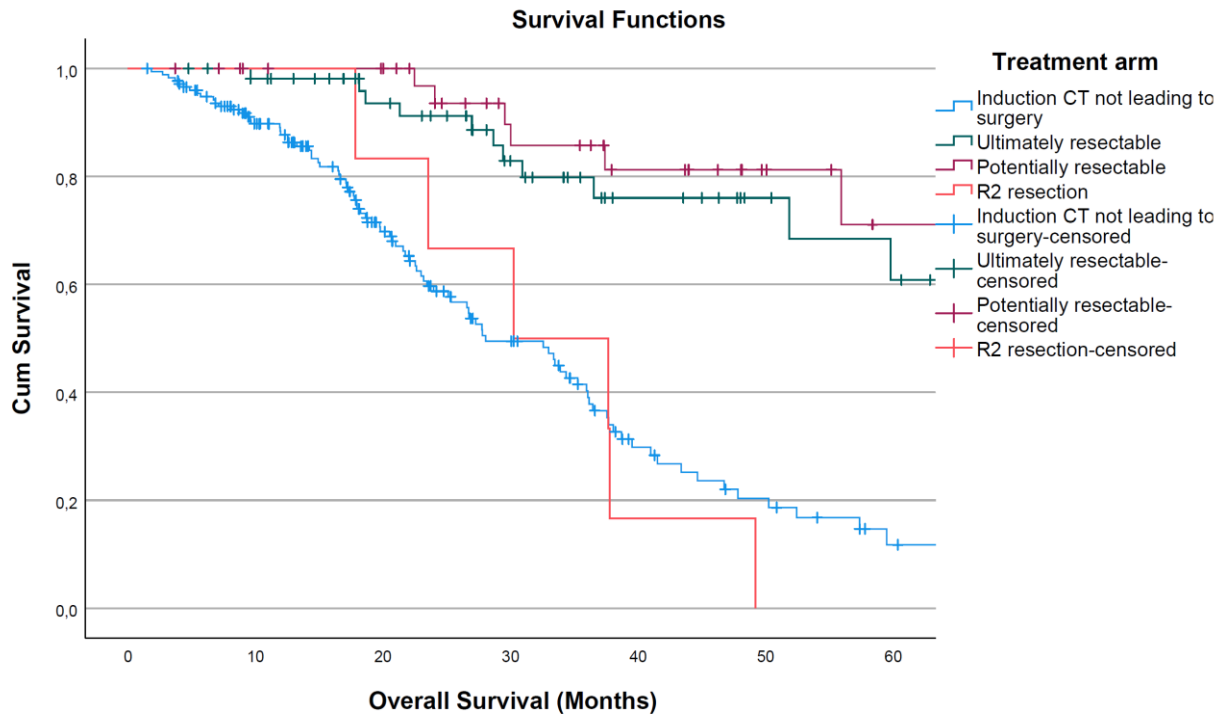

**Means and Medians for Survival Time**

| Treatment arm                       | Estimate | Std. Error | Mean <sup>a</sup>       |             | Estimate | Std. Error | Median                  |             |
|-------------------------------------|----------|------------|-------------------------|-------------|----------|------------|-------------------------|-------------|
|                                     |          |            | 95% Confidence Interval |             |          |            | 95% Confidence Interval |             |
|                                     |          |            | Lower Bound             | Upper Bound |          |            | Lower Bound             | Upper Bound |
| Induction CT not leading to surgery | 33,078   | 1,918      | 29,318                  | 36,838      | 28,039   | 3,007      | 22,145                  | 33,933      |
| Ultimately resectable               | 62,974   | 4,336      | 54,476                  | 71,472      | 79,379   | ,000       | .                       | .           |
| Potentially resectable              | 83,119   | 8,212      | 67,024                  | 99,213      | .        | .          | .                       | .           |
| R2 resection                        | 32,696   | 4,597      | 23,687                  | 41,705      | 30,229   | 8,645      | 13,284                  | 47,173      |
| Overall                             | 47,395   | 3,432      | 40,668                  | 54,123      | 37,778   | 2,535      | 32,810                  | 42,746      |

a. Estimation is limited to the largest survival time if it is censored.

**Pairwise Comparisons**

|                       | Treatment arm                       | Induction CT not leading to surgery |       | Ultimately resectable |       | Potentially resectable |       | R2 resection |       |
|-----------------------|-------------------------------------|-------------------------------------|-------|-----------------------|-------|------------------------|-------|--------------|-------|
|                       |                                     | Chi-Square                          | Sig.  | Chi-Square            | Sig.  | Chi-Square             | Sig.  | Chi-Square   | Sig.  |
| Log Rank (Mantel-Cox) | Induction CT not leading to surgery |                                     |       | 29,582                | <,001 | 29,187                 | <,001 | ,096         | ,756  |
|                       | Ultimately resectable               | 29,582                              | <,001 |                       |       | ,588                   | ,443  | 12,633       | <,001 |
|                       | Potentially resectable              | 29,187                              | <,001 | ,588                  | ,443  |                        |       | 16,457       | <,001 |
|                       | R2 resection                        | ,096                                | ,756  | 12,633                | <,001 | 16,457                 | <,001 |              |       |

#### 4) Figure S4: Kaplan-Meier curves for PFS including all R2 resections

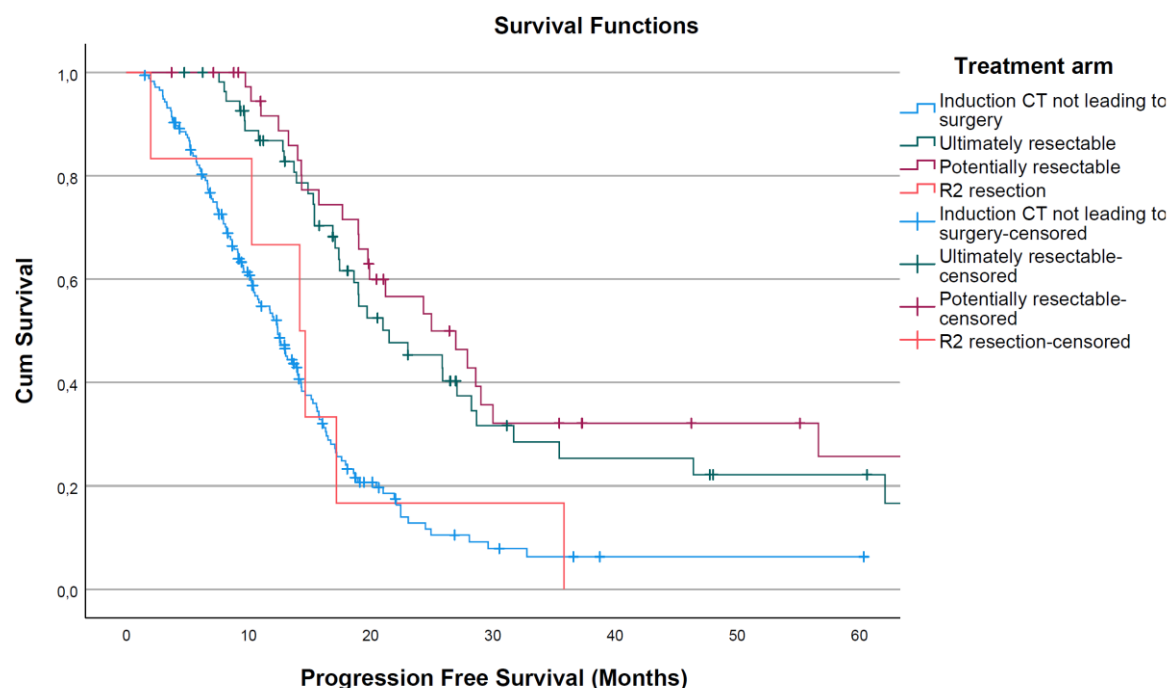

**Means and Medians for Survival Time**

| Treatment arm                       | Mean <sup>a</sup> |            |                         |        | Median   |            |                         |        |
|-------------------------------------|-------------------|------------|-------------------------|--------|----------|------------|-------------------------|--------|
|                                     | Estimate          | Std. Error | 95% Confidence Interval |        | Estimate | Std. Error | 95% Confidence Interval |        |
| Induction CT not leading to surgery | 15,483            | 1,250      | 13,034                  | 17,932 | 12,386   | ,832       | 10,754                  | 14,017 |
| Ultimately resectable               | 31,831            | 3,705      | 24,570                  | 39,093 | 21,503   | 3,548      | 14,549                  | 28,458 |
| Potentially resectable              | 42,152            | 6,813      | 28,798                  | 55,507 | 24,967   | 4,221      | 16,695                  | 33,240 |
| R2 resection                        | 15,681            | 4,574      | 6,715                   | 24,647 | 14,183   | 2,682      | 8,927                   | 19,439 |
| Overall                             | 25,533            | 2,249      | 21,124                  | 29,942 | 15,294   | ,696       | 13,929                  | 16,659 |

a. Estimation is limited to the largest survival time if it is censored.

**Pairwise Comparisons**

| Treatment arm                       | Induction CT not leading to surgery |       | Ultimately resectable |       | Potentially resectable |       | R2 resection |      |
|-------------------------------------|-------------------------------------|-------|-----------------------|-------|------------------------|-------|--------------|------|
|                                     | Chi-Square                          | Sig.  | Chi-Square            | Sig.  | Chi-Square             | Sig.  | Chi-Square   | Sig. |
| Log Rank (Mantel-Cox)               |                                     |       |                       |       |                        |       |              |      |
| Induction CT not leading to surgery |                                     |       | 25,718                | <,001 | 25,944                 | <,001 | ,045         | ,832 |
| Ultimately resectable               | 25,718                              | <,001 |                       |       | ,645                   | ,422  | 4,360        | ,037 |
| Potentially resectable              | 25,944                              | <,001 | ,645                  | ,422  |                        |       | 6,097        | ,014 |
| R2 resection                        | ,045                                | ,832  | 4,360                 | ,037  | 6,097                  | ,014  |              |      |

5) **Figure S5: Kaplan-Meier curves for PFS of patients discussed within and outside MDT**

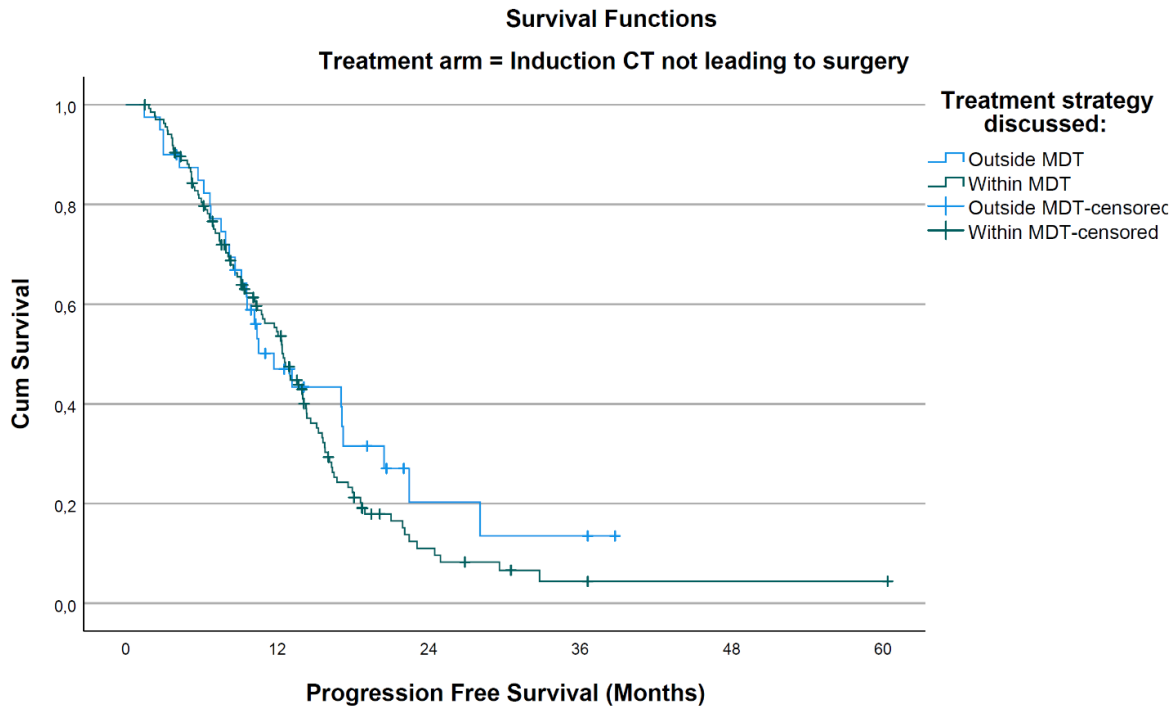

**Figure S5A:** Kaplan-Meier curves for PFS of patients undergoing induction ST not leading to surgery within and outside MDT

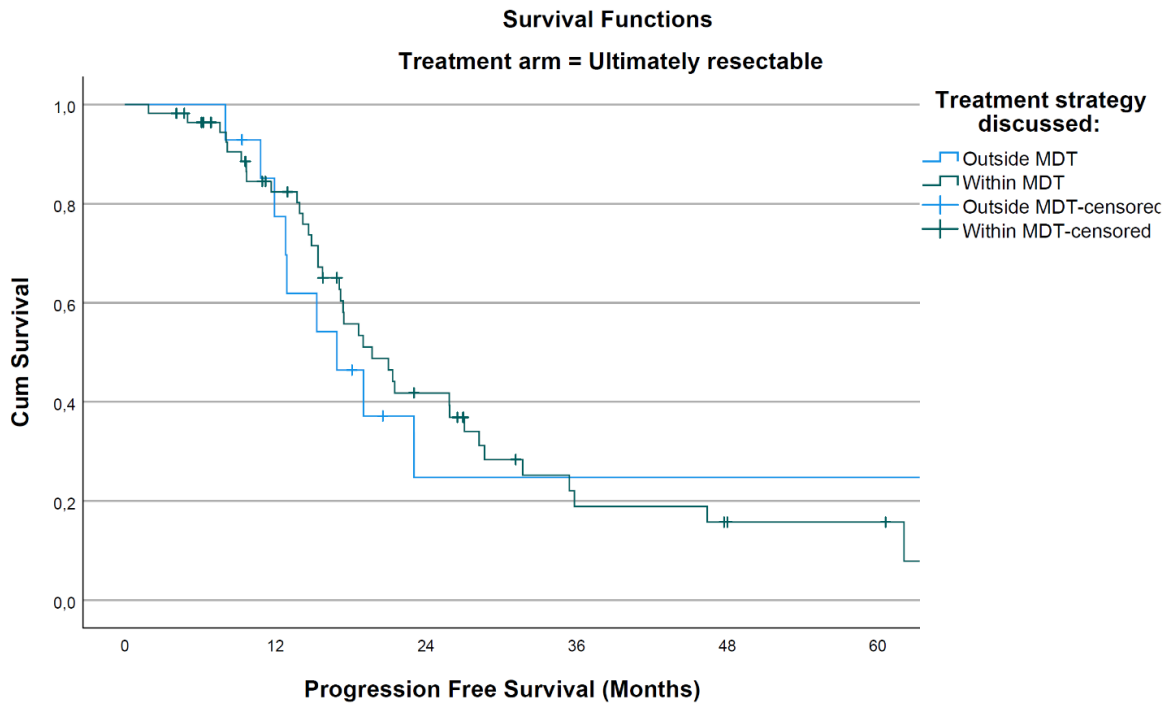

**Figure S5B:** Kaplan-Meier curves for PFS of ultimately resectable patients within and outside MDT

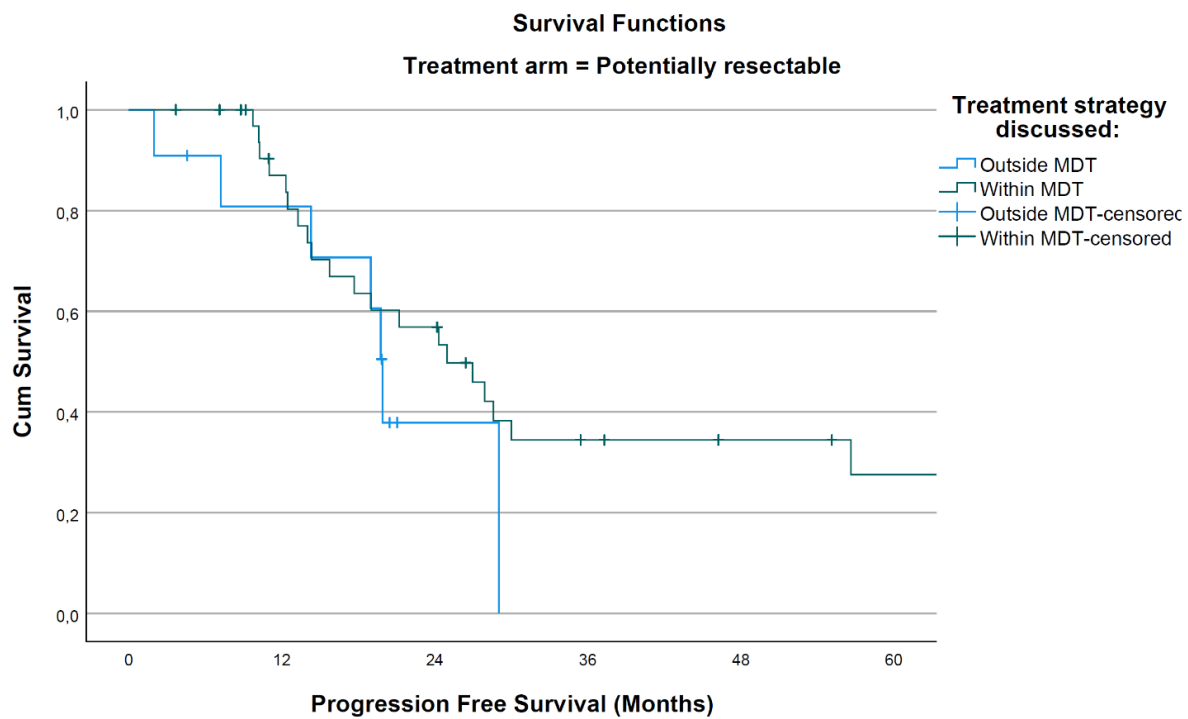

**Figure S5C:** Kaplan-Meier curves for PFS of potentially resectable patients within and outside MDT

6) **Figure S6: Kaplan-Meier curves for OS of patients receiving different I line ST regimens**

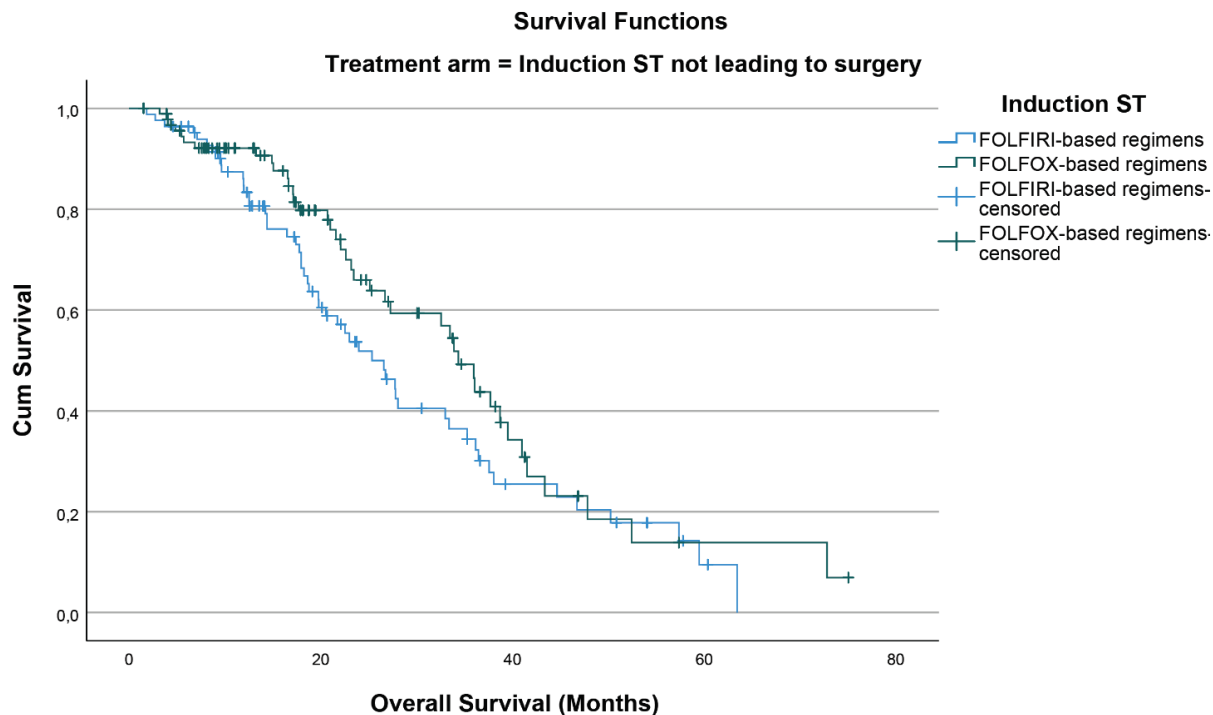

**Figure S6A:** Kaplan-Meier curves for OS of patients undergoing induction ST not leading to surgery and receiving different I line ST regimens.

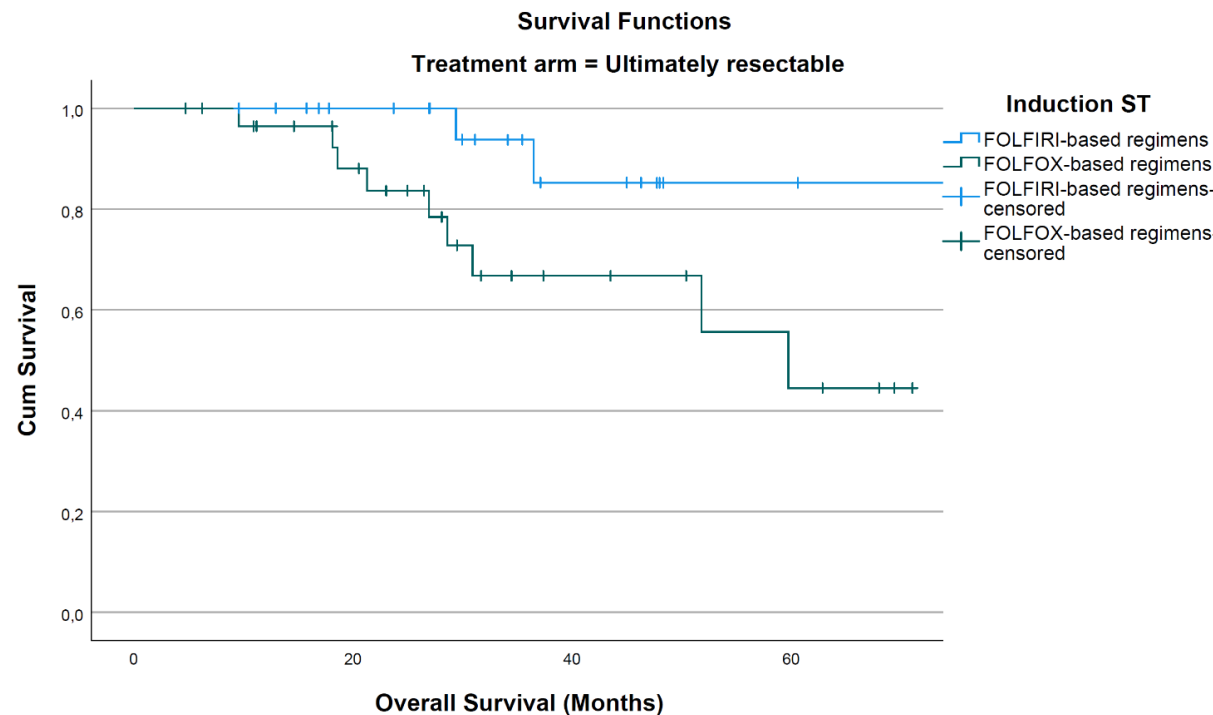

**Figure S6B:** Kaplan-Meier curves for OS of ultimately resectable patients and receiving different I line ST regimens.



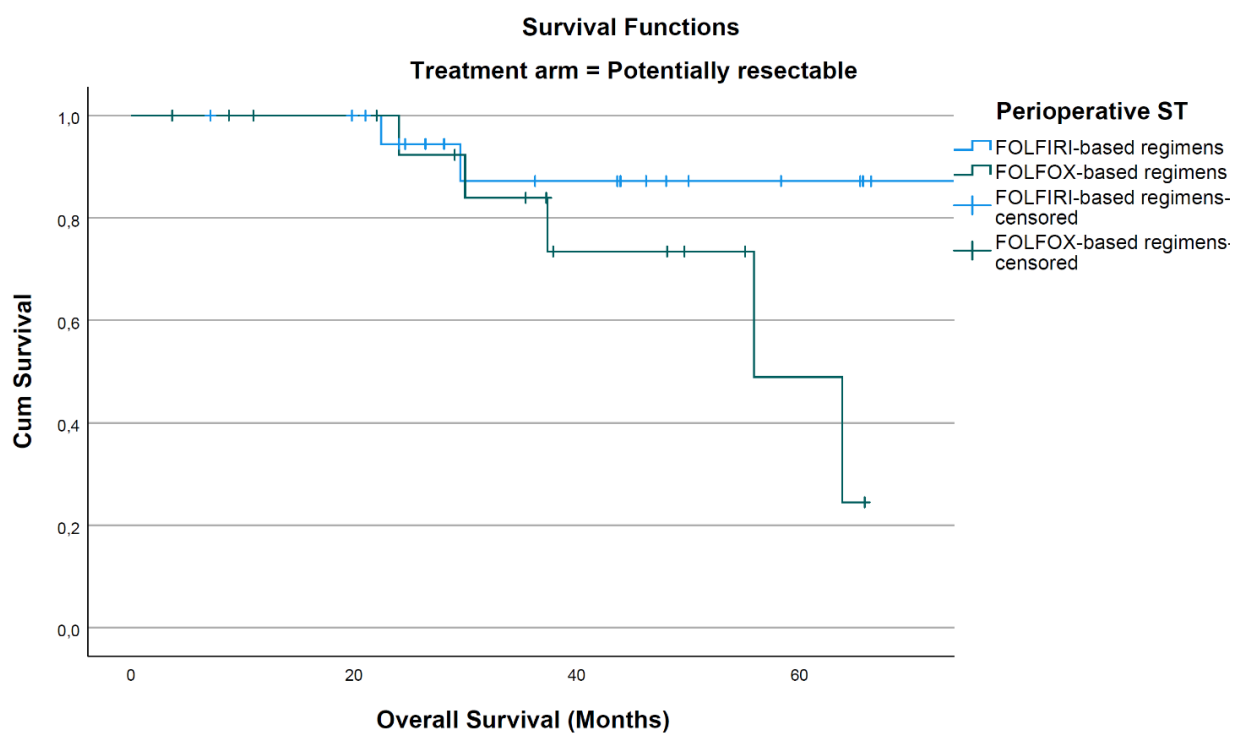

**Figure S6C:** Kaplan-Meier curves for OS of potentially resectable patients and receiving different perioperative ST regimens.

7) **Figure S7: Kaplan-Meier curves for PFS of patients receiving different I line ST regimens**

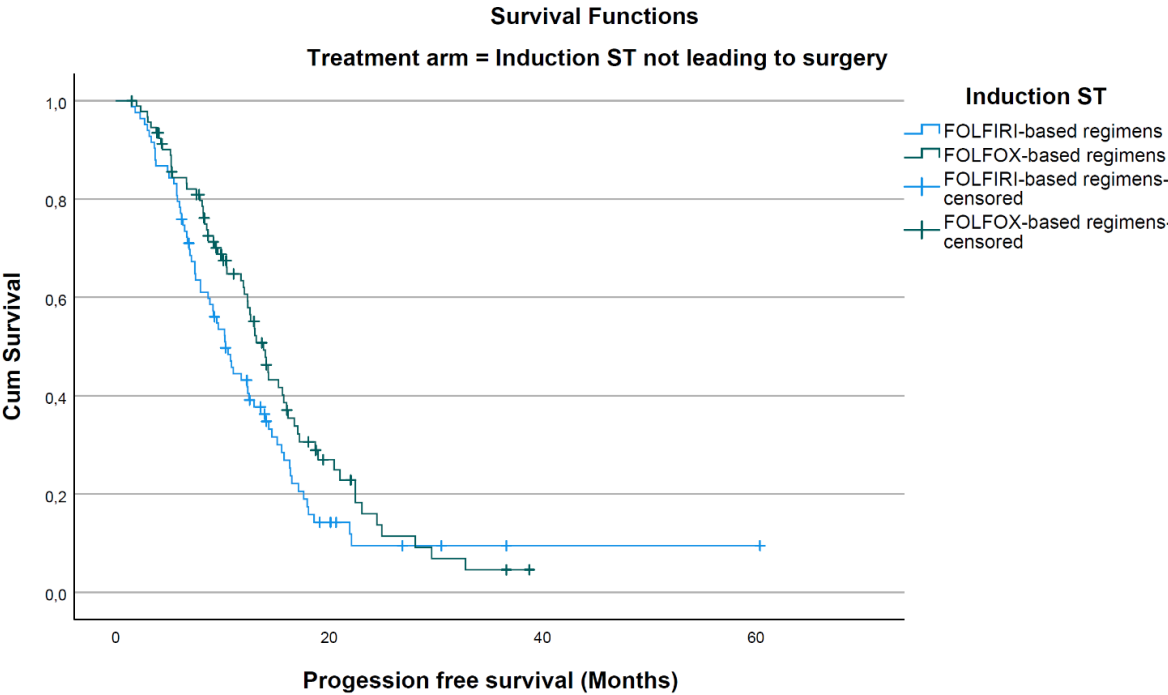

**Figure S7A:** Kaplan-Meier curves for PFS of patients undergoing induction ST not leading to surgery and receiving different I line ST regimens.

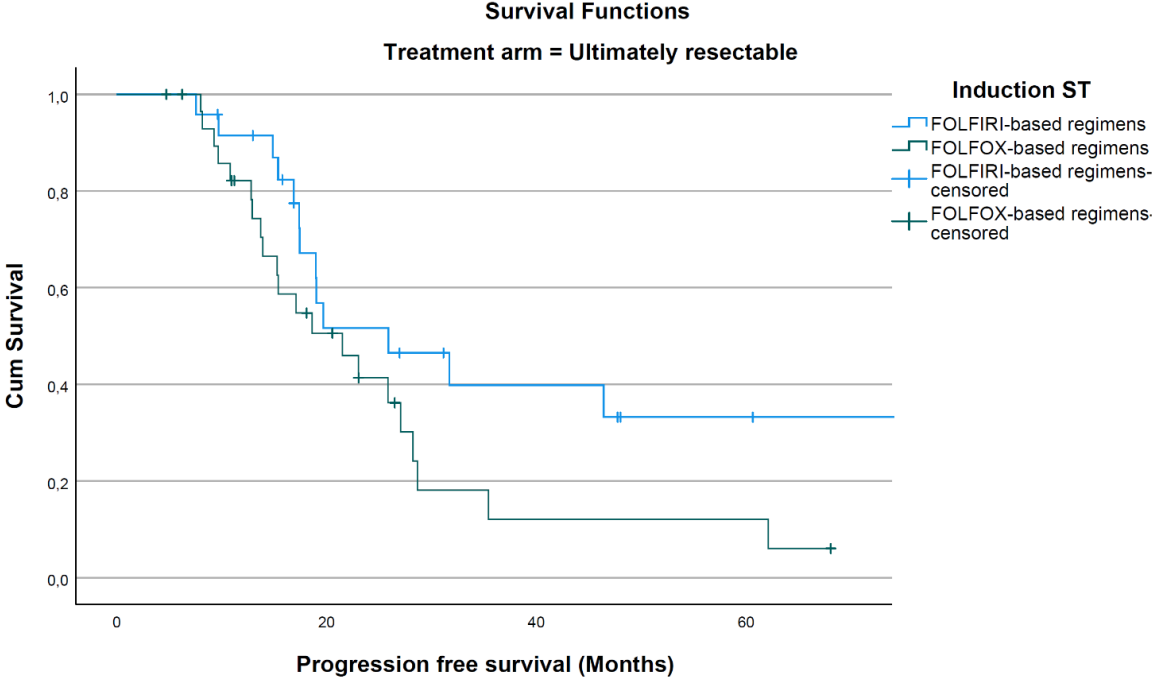

**Figure S7B:** Kaplan-Meier curves for PFS of ultimately resectable patients and receiving different I line ST regimens.

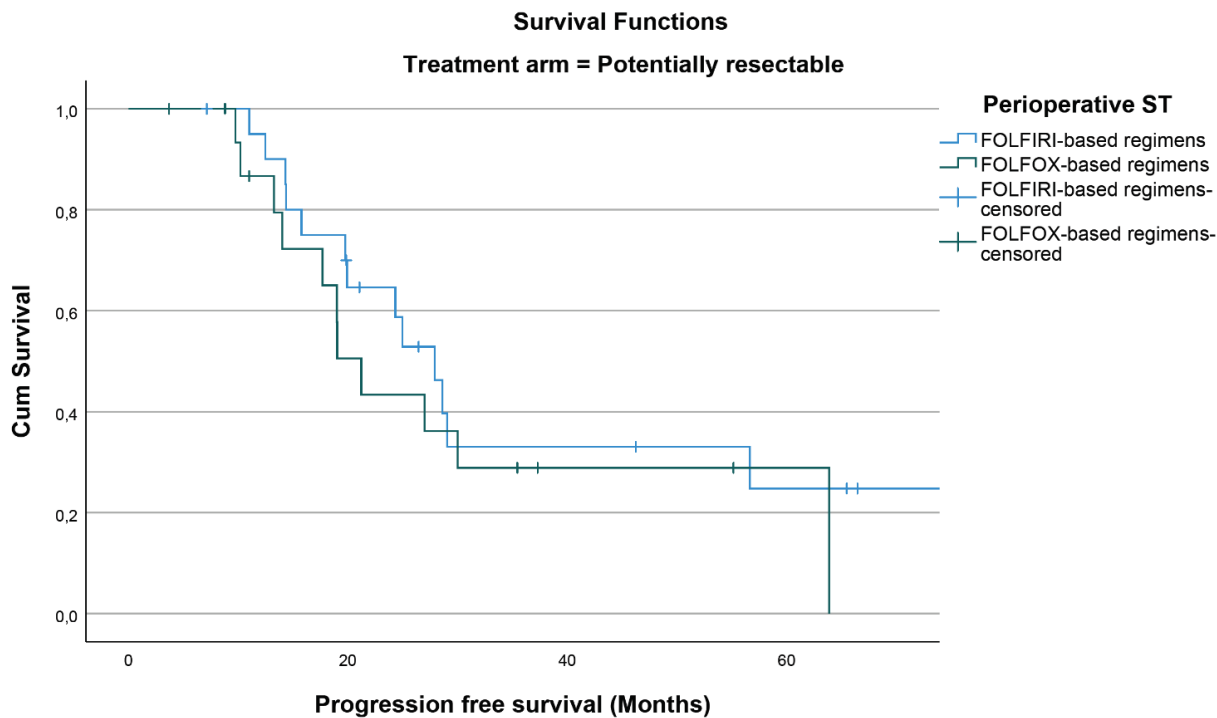

**Figure S7C:** Kaplan-Meier curves for PFS of potentially resectable patients and receiving different perioperative ST regimens.
